# Supplementary material for: Comparison of observation- and inventory-based methane emissions for eight large global emitters
Source: Copernicus journal article supplement (doi:10.5194/essd-16-4325-2024), 2024-09-25
Supplement: Supplementary file 1 [file essd-16-4325-2024-supplement.pdf]

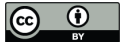

*Supplement of*

## **Comparison of observation- and inventory-based methane emissions for eight large global emitters**

**Ana Maria Roxana Petrescu et al.**

*Correspondence to:* Ana Maria Roxana Petrescu (a.m.r.petrescu@vu.nl)

The copyright of individual parts of the supplement might differ from the article licence.

## 1. Data products

CoCO<sub>2</sub> (<https://coco2-project.eu/>) is a scientific collaborative effort funded by the H2020 European Commissions, grant number 958927. This synthesis has been originally based on data and country specific plots from previous VERIFY project, for the EU27: <https://webportals.ipsl.fr/VERIFY/FactSheets>, v1.28 and on the WP8 deliverable reports D8.1 (<https://coco2-project.eu/node/333>), D8.2 (<https://coco2-project.eu/node/360>) and D8.3 (<https://coco2-project.eu/index.php/node/406>) from the CoCO<sub>2</sub> project website. The data behind all figures is found at: <https://doi.org/10.5281/zenodo.12818506> (Petrescu et al., 2024).

We used BU anthropogenic emissions from national inventory reports (NIRs and CRFs) (UNFCCC, 2023) and global datasets covering all sectors (EDGAR v7.0, GAINS (no IPPU), FAOSTAT/PRIMAP-hist) and the TNO\_PED18-21 dataset developed under the CoCO<sub>2</sub> project.

Natural CH<sub>4</sub> emissions from the VERIFY synthesis (Petrescu et al., 2023) were used for the EU27 analysis and belong to biogeochemical models of wetlands/peatlands and mineral soil emissions (JSBACH-HIMMELI), inland waters (lakes, rivers and reservoirs) plus updated data for the RECCAP2 project (Lauerwald et al., 2023), updated activity data for total geological emissions here in SI (based on Etiope et al., 2019) and biomass burning from GFEDv4.1s (van der Werf et al., 2017). Global natural wetlands emissions belong to LPJ-GUESS and inland waters (global lakes & reservoirs) to ORNL DAAC (Johnson et al., 2021, 2022) (see Table S1).

TD approaches include both regional and global inversions, the latter having a coarser spatial resolution. These estimates are described in the following Table S1.

*Table S1: Data sources for CH<sub>4</sub> emissions used in this study:*

| Name                                          | Domain          | Description                                                                                                         | Contact / lab                                                                       | References                                                                                                                                                                                                             | Status compared to Petrescu et al., 2023 |
|-----------------------------------------------|-----------------|---------------------------------------------------------------------------------------------------------------------|-------------------------------------------------------------------------------------|------------------------------------------------------------------------------------------------------------------------------------------------------------------------------------------------------------------------|------------------------------------------|
| <b>CH<sub>4</sub> Bottom-up anthropogenic</b> |                 |                                                                                                                     |                                                                                     |                                                                                                                                                                                                                        |                                          |
| UNFCCC NGHGI (2023) CRFs and BURs             | EU27            | CH <sub>4</sub> emissions 1990-2021                                                                                 | MS inventory agencies<br>Yearly uncertainties provided by the EU GHG inventory team | UNFCCC CRFs <a href="https://unfccc.int/ghg-inventories-annex-i-parties/2023">https://unfccc.int/ghg-inventories-annex-i-parties/2023</a><br>UNFCCC BURs <a href="https://unfccc.int/BURs">https://unfccc.int/BURs</a> | Updated                                  |
| EDGAR v7.0                                    | EU27 and global | Total and sectoral global CH <sub>4</sub> emissions 1990-2021                                                       | EC-JRC                                                                              | Crippa et al., 2020<br>Crippa et al., 2019 JRC report<br>Janssens-Maenhout et al., 2019<br>Solazzo et al., 2021                                                                                                        | Updated                                  |
| GAINS                                         | EU27 and global | Total and sectoral global CH <sub>4</sub> emissions 1990-2020                                                       | IIASA                                                                               | Höglund-Isaksson, L. 2017<br>Höglund-Isaksson, L. et al., 2020                                                                                                                                                         | Updated                                  |
| FAOSTAT /PRIMAP-hist 2.4                      | EU27 and global | Global CH <sub>4</sub> agriculture and land use emissions, as well as for other sectors (based on PRIMAP) 1990-2020 | FAO                                                                                 | Tubiello et al. 2013<br>Tubiello, 2019, 2022<br>FAO, 2015, 2023<br>Gütschow and Pflüger, 2022                                                                                                                          | Updated                                  |
| TNO_CoCO <sub>2</sub> _PED18-21               | EU27 and global | Total CH <sub>4</sub> emissions as following: PED18 for EU27 2000-2018<br>PED18 for global countries 2010-2018      | TNO                                                                                 | CoCO <sub>2</sub> deliverables D2.1 and D2.2<br>D2.1 Prior Emission Dataset (PED) 2016  <br>CoCO <sub>2</sub> : Prototype system                                                                                       | New                                      |

|                                                          |        |                                                                                                                             |                                                                |                                                                                                                                                                                                                                                      |                 |
|----------------------------------------------------------|--------|-----------------------------------------------------------------------------------------------------------------------------|----------------------------------------------------------------|------------------------------------------------------------------------------------------------------------------------------------------------------------------------------------------------------------------------------------------------------|-----------------|
|                                                          |        | PED21 for all countries<br>2021                                                                                             |                                                                | for a Copernicus CO <sub>2</sub><br>service (coco2-project.eu)                                                                                                                                                                                       |                 |
|                                                          |        |                                                                                                                             |                                                                | D2.2 Prior Emissions data<br>2021   CoCO <sub>2</sub> : Prototype<br>system for a Copernicus<br>CO <sub>2</sub> service (coco2-<br>project.eu)                                                                                                       |                 |
| <b>CH<sub>4</sub> bottom-up natural</b>                  |        |                                                                                                                             |                                                                |                                                                                                                                                                                                                                                      |                 |
| LPJ-GUESS                                                | Global | Global CH <sub>4</sub> emissions from<br>wetlands<br>1990-2021                                                              | U Lund                                                         | Wania et al., 2009<br>Wania et al., 2010<br>Spahni et al., 2011<br>Zhang et al., 2021                                                                                                                                                                | New             |
| JSBACH-HIMMELI                                           | EU27   | European CH <sub>4</sub> emissions from<br>peatlands and mineral soils<br>2005-2020                                         | FMI                                                            | Raivonen et al., 2017<br>Susiluoto et al., 2018                                                                                                                                                                                                      | Not updated     |
| DAAC ORNL                                                | Global | Global CH <sub>4</sub> emissions from lakes<br>(2003-2015) and dam-reservoirs<br>(2002-2015)                                | NASA                                                           | Johnson et al. 2021 and<br>2022                                                                                                                                                                                                                      | New             |
| Geological emissions                                     | Global | Global grid geological CH <sub>4</sub><br>emission model (2019)                                                             | Istituto Nazionale di<br>Geofisica e<br>Vulcanologia<br>(INGV) | Etiopie et al., 2019 and<br>current work (updated<br>activity data)                                                                                                                                                                                  | Updated         |
| GFED4.1s                                                 | Global | Biomass burning global CH <sub>4</sub><br>emissions<br>2000-2020                                                            | VU Amsterdam                                                   | van der Werf et al., 2017                                                                                                                                                                                                                            | not updated     |
| <b>CH<sub>4</sub> top-down natural and anthropogenic</b> |        |                                                                                                                             |                                                                |                                                                                                                                                                                                                                                      |                 |
| FLExKF-v2023                                             | EU27   | Regional total CH <sub>4</sub> emissions<br>from inversions with uncertainty<br>2005-2021                                   | EMPA                                                           | Brunner et al., 2012<br>Brunner et al., 2017<br>Segers et al., 2020                                                                                                                                                                                  | Updated         |
| CAMS v21r1                                               | Global | Total and source split partitions<br>for global CH <sub>4</sub> emissions<br>NOAA (1979-2021)<br>NOAA_GOSAT (2009-2021)     | TNO                                                            | Huijnen et al., 2010<br>Pandey et al., 2022<br>Segers et al., 2022                                                                                                                                                                                   | New             |
| CTE-GCP2021                                              | Global | Total global CH <sub>4</sub> emissions with<br>source split partitions and<br>posterior flux uncertainty<br>2000-2020       | FMI                                                            | Bruhwiller et al., 2014<br>Houweling et al., 2014<br>Giglio et al., 2013<br>Ito et al., 2012<br>Janssens-Maenhout et al.,<br>2013<br>Krol et al., 2005<br>Peters et al., 2005<br>Saunio et al., 2020<br>Stocker et al., 2014<br>Tsuruta et al., 2017 | New             |
| CIF-CHIMERE<br>and<br>CIF-FLEXPARTv10.4                  | EU27   | Total regional CH <sub>4</sub> emissions<br>from inversions<br>CHIMERE:<br>2005-2022<br>FLEXPART: 2005-2020                 | LSCE, NILU                                                     | Berchet et al., 2021<br>Fortems-Cheiney et al.,<br>2021                                                                                                                                                                                              | New and updated |
| MIROC4-ACTM<br>(control and OH<br>varying runs)          | Global | Total and source split partitions<br>for global CH <sub>4</sub> emissions (2 runs:<br>control and variable OH)<br>2001-2021 | JAMSTEC                                                        | Patra et al., 2021<br>Chandra et al., 2021                                                                                                                                                                                                           | New             |
| TM5-4DVAR<br>(TROPOMI)                                   | Global | Total and source split partitions<br>for global CH <sub>4</sub> emissions<br>May2018-2020                                   | VUA                                                            | Huijnen et al., 2010<br>Lorente et al., 2023                                                                                                                                                                                                         | New             |
| GEOS-Chem CTM<br>(TROPOMI for USA)                       | USA    | Total CH <sub>4</sub> emissions for USA<br>2019                                                                             | Harvard University                                             | Nesser et al., 2023                                                                                                                                                                                                                                  | New             |
| CEOS (GOSAT)                                             | Global | Total and source split partitions<br>for global CH <sub>4</sub> emissions<br>2019                                           | NASA/JPL                                                       | Worden et al., 2019                                                                                                                                                                                                                                  | New             |

The following BU anthropogenic data products used in this paper are described in detail in Petrescu et al., 2023, Appendix A1.1: UNFCCC NGHGI, EDGAR, GAINS and FAOSTAT. The TNO\_PED18-21 dataset is described in D2.1 Prior Emission Dataset (PED) 2016 (<https://coco2-project.eu/index.php/node/327>) and D2.2 Prior Emissions data 2021 (<https://coco2-project.eu/node/365>).

The natural CH<sub>4</sub> products are described in Petrescu et al., 2023, Appendix A2.1: inland waters and JSBACH-HIMMELI.

The following TD data products are described in Petrescu et al., 2023, Appendix A1.2: VERIFY CIF framework (Berchet et al., 2021), CTE-GCP, MIROC4-ACTM.

Priors used by different products are found in the Zenodo link: <https://doi.org/10.5281/zenodo.12818506> (Petrescu et al., 2024).

*Table S2: Source-specific activity data (AD), emission factors (EF), uncertainty methodology and contact details for the current data product collection*

| <b>CH<sub>4</sub> bottom-up anthropogenic emissions</b> |                                                                                                                                                                                                       |                                                         |                                                                                                                                                                                                                                                                                                                                                                                                                       |                                                                                                                                                                                                                                                                                                                                                                                                                                                     |
|---------------------------------------------------------|-------------------------------------------------------------------------------------------------------------------------------------------------------------------------------------------------------|---------------------------------------------------------|-----------------------------------------------------------------------------------------------------------------------------------------------------------------------------------------------------------------------------------------------------------------------------------------------------------------------------------------------------------------------------------------------------------------------|-----------------------------------------------------------------------------------------------------------------------------------------------------------------------------------------------------------------------------------------------------------------------------------------------------------------------------------------------------------------------------------------------------------------------------------------------------|
| <b>Data source</b>                                      | <b>AD/Tier</b>                                                                                                                                                                                        | <b>EFs/Tier</b>                                         | <b>Uncertainty assessment method</b>                                                                                                                                                                                                                                                                                                                                                                                  | <b>Emission data availability</b>                                                                                                                                                                                                                                                                                                                                                                                                                   |
| <b>UNFCCC NGHGI (2023) CRFs and BURs</b>                | Country-specific information consistent with the IPCC GLs.                                                                                                                                            | IPCC GLs/country-specific information for higher tiers. | IPCC GLs ( <a href="https://www.ipcc-nggip.iges.or.jp/public/2006gl/">https://www.ipcc-nggip.iges.or.jp/public/2006gl/</a> , last access: December 2019) for calculating the uncertainty of emissions based on the uncertainty of AD and EF, two different approaches: (1) error propagation and (2) Monte Carlo simulation.<br><br>The EU GHG inventory team provided yearly harmonized and gap-filled uncertainties | NGHGI official data (CRFs) are found at <a href="https://unfccc.int/ghg-inventories-annex-i-parties/2023">https://unfccc.int/ghg-inventories-annex-i-parties/2023</a><br><br>BUR official data are found at: <a href="https://unfccc.int/BURs">https://unfccc.int/BURs</a><br><br>For info on uncertainties please contact:<br><br>Bradley Matthews<br><a href="mailto:bradley.matthews@umweltbundesamt.at">bradley.matthews@umweltbundesamt.at</a> |
| <b>EDGAR v7.0</b>                                       | International Energy Agency (IEA) for fuel combustion<br><br>Food and Agricultural Organisation (FAO) for agriculture<br><br>US Geological Survey (USGS) for industrial processes (e.g. cement, lime, | IPCC 2006, Tier 1 or Tier 2 depending on the sector     | Tier 1 with error propagation by sectors for CH <sub>4</sub>                                                                                                                                                                                                                                                                                                                                                          | <a href="https://edgar.jrc.ec.europa.eu/dataset_ghg70">https://edgar.jrc.ec.europa.eu/dataset_ghg70</a><br><br>CRIPPA Monica:<br><a href="mailto:Monica.CRIPPA@ext.ec.europa.eu">Monica.CRIPPA@ext.ec.europa.eu</a>                                                                                                                                                                                                                                 |

|                                         |                                                                                                                                                                                                                                                                                                                                                 |                                                                                                                                                                                                                                                                                         |                                                                                                                                                                                                                                                                                                      |                                                                                                                                                                                                                                                                                                                                                                                   |
|-----------------------------------------|-------------------------------------------------------------------------------------------------------------------------------------------------------------------------------------------------------------------------------------------------------------------------------------------------------------------------------------------------|-----------------------------------------------------------------------------------------------------------------------------------------------------------------------------------------------------------------------------------------------------------------------------------------|------------------------------------------------------------------------------------------------------------------------------------------------------------------------------------------------------------------------------------------------------------------------------------------------------|-----------------------------------------------------------------------------------------------------------------------------------------------------------------------------------------------------------------------------------------------------------------------------------------------------------------------------------------------------------------------------------|
|                                         | <p>ammonia and ferroalloys)</p> <p>GGFR/NOAA for gas flaring</p> <p>World Steel Association for iron and steel production</p> <p>International Fertilisers Association (IFA) for urea consumption and production</p> <p>Complete description of the data sources can be found in Janssens-Maenhout et al. 2019 and in Crippa et al. (2019).</p> |                                                                                                                                                                                                                                                                                         |                                                                                                                                                                                                                                                                                                      |                                                                                                                                                                                                                                                                                                                                                                                   |
| <b>GAINS v2020</b>                      | <p>Livestock numbers by animal type (FAOSTAT, 2010; EUROSTAT, 2009; UNFCCC, 2010)</p> <p>Growth in livestock numbers from FAOSTAT (2003), CAPRI model (2009)</p> <p>Rice cultivation Land area for rice cultivation (FAOSTAT, 2010)</p> <p>Projections for EU are taken from the CAPRI Model</p>                                                | <p>Country-specific information and:</p> <p>Livestock - Implied EFs reported to UNFCCC and IPCC Tier 1 (2006, Vol.4, Ch. 10) default factors</p> <p>Rice cultivation - IPCC Tier 1–2 (2006, Vol. 4, p. 5.49)</p> <p>Agricultural waste burning - IPCC Tier 1 (2006, Vol. 5, p. 520)</p> | IPCC (2006, Vol.4, p.10.33) uncertainty range                                                                                                                                                                                                                                                        | <p>Detailed gridded CH<sub>4</sub> data can be obtained by contacting the data provider:</p> <p>Lena Höglund Isaksson</p> <p><a href="mailto:hoglund@iiasa.ac.at">hoglund@iiasa.ac.at</a></p>                                                                                                                                                                                     |
| <b>FAOSTAT/PRIMAP-hist v2.4 dataset</b> | <p>FAOSTAT Crop and Livestock Production domains from country reporting; FAOSTAT Land Use Domain; Harmonized world soil; ESA CCI and Copernicus Global Land Cover Service (C3S) maps; MODIS MCD12Q1 v6;</p> <p>FAO Gridded Livestock of the World; MODIS</p>                                                                                    | <p>IPCC guidelines Tier 1</p>                                                                                                                                                                                                                                                           | <p>IPCC (2006, Vol.4, p.10.33)</p> <p>Uncertainties in estimates of GHG emissions are due to uncertainties in emission factors and activity data. They may be related to, inter alia, natural variability, partitioning fractions, lack of spatial or temporal coverage, or spatial aggregation.</p> | <p>Agriculture total and subdomain specific</p> <p>GHG emissions are found for download at</p> <p><a href="https://www.fao.org/faostat/en/#data/GT">https://www.fao.org/faostat/en/#data/GT</a></p> <p>(last access: November 2023).</p> <p>For PRIMAP-hist data contact Johannes Gütschow:</p> <p><a href="mailto:mail@johannes-guetschow.de">mail@johannes-guetschow.de</a></p> |

|                                                                       |                                                                                                                                                                                                                                                      |                                                                                            |                                                                                                                |                                                                                                                                                                                                                                                                                                                                                                                                                                                                                                                                                                                                                                                                     |
|-----------------------------------------------------------------------|------------------------------------------------------------------------------------------------------------------------------------------------------------------------------------------------------------------------------------------------------|--------------------------------------------------------------------------------------------|----------------------------------------------------------------------------------------------------------------|---------------------------------------------------------------------------------------------------------------------------------------------------------------------------------------------------------------------------------------------------------------------------------------------------------------------------------------------------------------------------------------------------------------------------------------------------------------------------------------------------------------------------------------------------------------------------------------------------------------------------------------------------------------------|
|                                                                       | MCD64A1.006burned area products                                                                                                                                                                                                                      |                                                                                            |                                                                                                                |                                                                                                                                                                                                                                                                                                                                                                                                                                                                                                                                                                                                                                                                     |
| <b>TNO_CoCO<sub>2</sub>_PED18-21</b>                                  | <p>For EU Based on UNFCCC CRFs (i.e., Country-specific information consistent with the IPCC GLs)</p> <p>For Africa see Keita et al. (2021)</p> <p>For non-EU and non-Africa CAMS-GLOB-ANT uses EDGARv5</p>                                           | For EU Based on UNFCCC CRFs (i.e., IPCC GLs/country-specific information for higher tiers) | IPCC GLs<br><br>Super et al. 2020 (regional)<br>Choulga et al. 2021 (global)                                   | <p><a href="#">D2.1 Prior Emission Dataset (PED) 2016   CoCO<sub>2</sub>: Prototype system for a Copernicus CO<sub>2</sub> service (coco2-project.eu)</a></p> <p><a href="#">D2.2 Prior Emissions data 2021   CoCO<sub>2</sub>: Prototype system for a Copernicus CO<sub>2</sub> service (coco2-project.eu)</a></p> <p><a href="https://eccad.sedoo.fr/#/metadatas/600">https://eccad.sedoo.fr/#/metadatas/600</a></p> <p><a href="https://eccad.sedoo.fr/#/metadatas/606">https://eccad.sedoo.fr/#/metadatas/606</a></p> <p>Soulie et al., 2024</p> <p><a href="https://edgar.jrc.ec.europa.eu/dataset_ghg50">https://edgar.jrc.ec.europa.eu/dataset_ghg50</a></p> |
| <b>CH<sub>4</sub> bottom-up natural emissions</b>                     |                                                                                                                                                                                                                                                      |                                                                                            |                                                                                                                |                                                                                                                                                                                                                                                                                                                                                                                                                                                                                                                                                                                                                                                                     |
| <b>Data source</b>                                                    | <b>AD/Tier</b>                                                                                                                                                                                                                                       | <b>EFs/Tier</b>                                                                            | <b>Uncertainty assessment method</b>                                                                           | <b>Emission data availability</b>                                                                                                                                                                                                                                                                                                                                                                                                                                                                                                                                                                                                                                   |
| <b>CH<sub>4</sub> emissions from inland waters for EU27 (RECCAP2)</b> | Hydrosheds 15s (Lehner et al., 2008) and Hydro1K (USGS, 2000) for river network, HYDROLAKES for lakes and reservoirs network and surface area (Messenger et al., 2016); Worldwide Typology of estuaries by Dürr et al. (2011)                        | N/A                                                                                        | Four model configurations for CH <sub>4</sub>                                                                  | Detailed gridded data can be obtained by contacting the data providers:<br><br>Ronny Lauerwald<br><a href="mailto:ronny.lauerwald@inrae.fr">ronny.lauerwald@inrae.fr</a>                                                                                                                                                                                                                                                                                                                                                                                                                                                                                            |
| <b>JSBACH-HIMMELI</b>                                                 | <p>JSBACH vegetation and soil carbon and physical parameters provided to HIMMELI to simulate wetland methane fluxes</p> <p>HydroLAKES database (Messenger et al., 2016).</p> <p>CORINE land cover data</p> <p>VERIFY climate drivers 0.1° × 0.1°</p> | CH <sub>4</sub> fluxes from peatlands and mineral soils                                    | The standard deviation and the resulting range in the annual emission sum represents a measure of uncertainty. | Detailed gridded data CH <sub>4</sub> emissions can be obtained by contacting the data providers:<br><br><a href="mailto:Tuula.Aalto@fmi.fi">Tuula.Aalto@fmi.fi</a><br><br><a href="mailto:tiina.markkanen@fmi.fi">tiina.markkanen@fmi.fi</a>                                                                                                                                                                                                                                                                                                                                                                                                                       |

|                                                                                                   |                                                                                                                                                                                                                                                                                                                      |                                                                                     |                                                                                                               |                                                                                                                                                                                                                                                                                                                                                                                                             |
|---------------------------------------------------------------------------------------------------|----------------------------------------------------------------------------------------------------------------------------------------------------------------------------------------------------------------------------------------------------------------------------------------------------------------------|-------------------------------------------------------------------------------------|---------------------------------------------------------------------------------------------------------------|-------------------------------------------------------------------------------------------------------------------------------------------------------------------------------------------------------------------------------------------------------------------------------------------------------------------------------------------------------------------------------------------------------------|
| <p><b>CH<sub>4</sub> emissions from global lake systems</b></p> <p><b>ORNL-DAAC</b></p>           | <p>HydroLAKES and Climate Change Initiative Inland-Water (CCI-IW) remote-sensing data</p>                                                                                                                                                                                                                            | <p>N/A</p>                                                                          | <p>N/A</p>                                                                                                    | <p>Johnson, M.S. 2021. Global-Gridded Daily Methane Emissions from Inland Dam-Reservoir Systems. ORNL DAAC, Oak Ridge, Tennessee, USA. <a href="https://doi.org/10.3334/ORNLDAAC/1918">https://doi.org/10.3334/ORNLDAAC/1918</a></p>                                                                                                                                                                        |
| <p><b>CH<sub>4</sub> emissions from global dam-reservoirs systems</b></p> <p><b>ORNL-DAAC</b></p> | <p>The annual duration of the emission season is based on freeze-thaw cycles of these water bodies as applicable.</p>                                                                                                                                                                                                | <p>N/A</p>                                                                          | <p>N/A</p>                                                                                                    | <p><a href="https://daac.ornl.gov/cgi-bin/dsvviewer.pl?ds_id=1918">https://daac.ornl.gov/cgi-bin/dsvviewer.pl?ds_id=1918</a></p>                                                                                                                                                                                                                                                                            |
| <p><b>Geological emissions, including marine and land geological)</b></p>                         | <p>Areal distribution activity: <math>1^{\circ} \times 1^{\circ}</math> maps include the four main categories of natural geo-CH<sub>4</sub> emission: (a) onshore hydrocarbon macro-seeps, including mud volcanoes, (b) submarine (offshore) seeps, (c) diffuse micro-seepage and (d) geothermal manifestations.</p> | <p>CH<sub>4</sub> fluxes, measurements and estimates based on size and activity</p> | <p>95% confidence interval of the median<br/>emission-weighted mean<br/>sum of individual regional values</p> | <p>Etiopie et al, 2019 with updated activity for current study)<br/><br/>Detailed gridded data on geological CH<sub>4</sub> emissions can be obtained by contacting the data providers:<br/><br/>Giuseppe Etiopie:<br/><a href="mailto:giuseppe.etiope@ingv.it">giuseppe.etiope@ingv.it</a><br/><br/>Giancarlo Ciotoli<br/><a href="mailto:giancarlo.ciotoli@gmail.com">giancarlo.ciotoli@gmail.com</a></p> |
| <p><b>LPJ-GUESS</b></p>                                                                           | <p>hydrology scheme of Wania et al. (2009) and Granberg et al. (1999).<br/><br/>monthly wetland inundation data from the WAD2M dataset (Zhang et al., 2021).<br/><br/>LPJ GUESS is forced with a transient climate from the CRU_ts_4.05 data set</p>                                                                 | <p>N/A</p>                                                                          | <p>N/A</p>                                                                                                    | <p>For gridded CH<sub>4</sub> emissions please contact:<br/><br/>Wenxin Zhang<br/><a href="mailto:wenxin.zhang@nateko.lu.se">wenxin.zhang@nateko.lu.se</a></p>                                                                                                                                                                                                                                              |

| <b>Biomass burning CH<sub>4</sub> emissions GFEDv4.1s</b>                 | The GFED4.1s data include small fires and are provided in HDF5 format. The mapped burned area is without small fires and this is the GFED4 burned area described in Giglio et al. (2013).                                                                    | N/A                                                   | N/A                                                                                                                                                                                                                                                  | <a href="https://www.globalfiredata.org/">https://www.globalfiredata.org/</a><br><a href="https://daac.ornl.gov/VEGETATION/guides/fire_emissions_v4_R1.html">https://daac.ornl.gov/VEGETATION/guides/fire_emissions_v4_R1.html</a><br>For further contacts and data please contact:<br>Guido van der Werf<br><a href="mailto:guido.vanderwerf@wur.nl">guido.vanderwerf@wur.nl</a>                                                                                     |
|---------------------------------------------------------------------------|--------------------------------------------------------------------------------------------------------------------------------------------------------------------------------------------------------------------------------------------------------------|-------------------------------------------------------|------------------------------------------------------------------------------------------------------------------------------------------------------------------------------------------------------------------------------------------------------|-----------------------------------------------------------------------------------------------------------------------------------------------------------------------------------------------------------------------------------------------------------------------------------------------------------------------------------------------------------------------------------------------------------------------------------------------------------------------|
| <b>CH<sub>4</sub> Top-down inversions</b>                                 |                                                                                                                                                                                                                                                              |                                                       |                                                                                                                                                                                                                                                      |                                                                                                                                                                                                                                                                                                                                                                                                                                                                       |
| <b>Regional inversions over Europe (high transport model resolution )</b> |                                                                                                                                                                                                                                                              |                                                       |                                                                                                                                                                                                                                                      |                                                                                                                                                                                                                                                                                                                                                                                                                                                                       |
| <b>Data source</b>                                                        | <b>AD/Tier</b>                                                                                                                                                                                                                                               | <b>EFs/Tier</b>                                       | <b>Uncertainty assessment method</b>                                                                                                                                                                                                                 | <b>Emission data availability</b>                                                                                                                                                                                                                                                                                                                                                                                                                                     |
| <b>FLE<sub>x</sub>KF_v2023</b>                                            | Extended Kalman Filter in combination with backward Lagrangian transport simulations using the model FLEXPART Atmospheric observations<br><br>ECMWF Era Interim meteorological fields                                                                        | FLE <sub>x</sub> KF-CAMsv19r_EMPA specific background | The random uncertainties are represented by the posterior error covariance matrix provided by the Kalman Filter, which combines errors in the prior fluxes with errors in the observations and model representation (see description in Appendix A1) | Detailed gridded data can be obtained by contacting the data provider:<br><br><a href="mailto:Dominik.Brunner@empa.ch">Dominik.Brunner@empa.ch</a>                                                                                                                                                                                                                                                                                                                    |
| <b>CIF CHIMERE CIF FLEXPARTv1 0.4</b>                                     | Extended Kalman Filter in combination with backward Lagrangian transport simulations using the model FLEXPART Atmospheric observations<br><br>ECMWF Era Interim meteorological fields<br><br>CHIMERE is a non-hydrostatic Eulerian chemistry-transport model |                                                       | The uncertainty in each grid cell (0.25°x0.25° for CH <sub>4</sub> ) includes one due to the spatial disaggregation plus one due to emission-weighted uncertainty of a specific process.                                                             | Detailed gridded data can be obtained by contacting the data providers:<br><br>Antoine Berchet<br><a href="mailto:antoine.berchet@lsce.ipsl.fr">antoine.berchet@lsce.ipsl.fr</a><br><br>Espen Solum<br><a href="mailto:eso@nilu.no">eso@nilu.no</a><br><br>Gregoire Broquet<br><a href="mailto:gregoire.broquet@lsce.ipsl.fr">gregoire.broquet@lsce.ipsl.fr</a><br><br>Isabelle Pison<br><a href="mailto:isabelle.pison@lsce.ipsl.fr">isabelle.pison@lsce.ipsl.fr</a> |
| <b>Global inversions</b>                                                  |                                                                                                                                                                                                                                                              |                                                       |                                                                                                                                                                                                                                                      |                                                                                                                                                                                                                                                                                                                                                                                                                                                                       |
| <b>TM5-4DVAR (TROPOMI)</b>                                                | Global Eulerian model, using TROPOMI satellite retrievals, ERA 5                                                                                                                                                                                             | 4DVAR variational techniques                          | N/A                                                                                                                                                                                                                                                  | Detailed gridded data can be obtained by contacting the data provider:                                                                                                                                                                                                                                                                                                                                                                                                |



|                                                                                   |                                                                                                                                                                                        |                                                                                                                                                                                                         |                                                                                                                                                                                                                                                                         |                                                                                                                                                                                                                                                                                                                                                        |
|-----------------------------------------------------------------------------------|----------------------------------------------------------------------------------------------------------------------------------------------------------------------------------------|---------------------------------------------------------------------------------------------------------------------------------------------------------------------------------------------------------|-------------------------------------------------------------------------------------------------------------------------------------------------------------------------------------------------------------------------------------------------------------------------|--------------------------------------------------------------------------------------------------------------------------------------------------------------------------------------------------------------------------------------------------------------------------------------------------------------------------------------------------------|
|                                                                                   | meteo and CAMS reanalysis                                                                                                                                                              |                                                                                                                                                                                                         |                                                                                                                                                                                                                                                                         | Jacob van Peet<br><a href="mailto:j.c.a.van.peet@vu.nl">j.c.a.van.peet@vu.nl</a><br>Sander Houweling<br><a href="mailto:s.houweling@vu.nl">s.houweling@vu.nl</a>                                                                                                                                                                                       |
| <b>CTE-GCP2021</b>                                                                | Ensemble Kalman filter<br>Eulerian transport model TM5<br>ECMWF ERA-Interim meteorological data                                                                                        | prior fluxes from LPX-Bern DYP TOP, EDGAR v4.2 FT2010<br>GFED v4<br>Termites and ocean fluxes<br>ground-based surface CH <sub>4</sub> observations<br>GOSAT XCH <sub>4</sub> retrievals from NIES v2.72 | The prior uncertainty is assumed to be a Gaussian probability distribution function<br><br>The posterior uncertainty is calculated as standard deviation of the ensemble members, where the posterior error covariance matrix are driven by the ensemble Kalman filter. | Detailed gridded data can be obtained by contacting the data provider:<br><br><a href="mailto:aki.tsuruta@fmi.fi">aki.tsuruta@fmi.fi</a>                                                                                                                                                                                                               |
| <b>CAMSv21r1 (NOAA and NOAA_GOSAT)</b>                                            | Bayesian inversion method<br><br>observations of atmospheric mixing ratios<br><br>ECMWF ERA5 re-analysis<br><br>EDGAR v6.0<br><br>LPJ-wsl<br><br>GFAS                                  | Fires emission factors from Akagi et al., 2011                                                                                                                                                          | N/A                                                                                                                                                                                                                                                                     | Detailed gridded CH <sub>4</sub> data can be obtained by contacting the data provider:<br><br>Arjo Segers<br><br><a href="mailto:arjo.segers@tno.nl">arjo.segers@tno.nl</a>                                                                                                                                                                            |
| <b>MIROC4-ACTM (control and OH var)</b>                                           | Matrix inversion for calculation of fluxes from 53 and 84 partitions of the globe for CH <sub>4</sub><br>Forward model transport is nudged to JRA-55 horizontal winds and temperature. | Fire emissions for CH <sub>4</sub> are taken from GFEDv4s                                                                                                                                               | A posteriori uncertainties are obtained from the Bayesian statistics model. A priori emissions uncertainties are uncorrelated.                                                                                                                                          | Detailed gridded data can be obtained by contacting the data provider:<br><br>Prabir Patra<br><br><a href="mailto:prabir@jamstec.go.jp">prabir@jamstec.go.jp</a><br><br>Dmitry Belikov<br><br><a href="mailto:d.belikov@chiba-u.jp">d.belikov@chiba-u.jp</a>                                                                                           |
| <b>CEOS GEOS-Chem (GOSAT)</b><br><br><b>GEOS-Chem CTM (TROPOMI) for USA only)</b> | Bayesian algorithm<br><br>MERRA-2 meteorological fields (Gelaro et al., 2017)                                                                                                          |                                                                                                                                                                                                         | Uncertainties are provided for representation (or smoothing) error and data precision but not for systematic errors in the transport model or data                                                                                                                      | Worden et al., 2022<br><br><a href="https://acp.copernicus.org/articles/22/6811/2022/#section6">https://acp.copernicus.org/articles/22/6811/2022/#section6</a><br><br>Nesser et al., 2023<br><br><a href="https://egusphere.copernicus.org/preprints/2023/egusphere-2023-946/">https://egusphere.copernicus.org/preprints/2023/egusphere-2023-946/</a> |

## 2. CH<sub>4</sub> anthropogenic and natural emissions from bottom-up estimates (updates)

Data from three global datasets and models of CH<sub>4</sub> anthropogenic emissions inventories were used, namely: FAOSTAT, GAINS, EDGAR v7.0 and TNO\_PED18-21 (Table S1). These estimates are not completely independent from NGHGIs (see Figure 4 in Petrescu et al., 2020) as they integrate their own sectorial modelling with the UNFCCC data (e.g., common activity data and IPCC emission factors) when no other source of information is available. The CH<sub>4</sub> biomass and biofuel burning emissions are included in NGHGI under the UNFCCC LULUCF sector, although they are identified as a separate category by the Global Carbon Project CH<sub>4</sub> budget synthesis (Saunio et al., 2020).

Since 2022, FAOSTAT includes estimates for all IPCC economic sectors: Energy, IPPU, Waste and Other. These data are sourced from the PRIMAP-hist v2.4 dataset (Gütschow and Pflüger, 2022). Emissions totals from agrifood domain are computed following the Tier 1 methods of the Intergovernmental Panel on Climate Change (IPCC) Guidelines for National greenhouse gas (GHG) Inventories. Emissions from other economic sectors as defined by the IPCC are also disseminated in the domain for completeness. Emissions are calculated based on data from the UN Statistical Division (UNSD), the International Energy Agency (IEA) and other third-party. Overall, the bottom-up inventories for EU27 do a good job in capturing magnitudes and trends, particularly for Agriculture. IPPU remains the sector which is underestimated by all three EDGAR versions and we hypothesize this has to do with the mapping of activities in EDGAR compared to the UNFCCC reporting guidelines.

Compared to Petrescu et al., 2023, in this study, we used additional natural lakes and reservoirs CH<sub>4</sub> emissions from the DAAC ORNL database; lakes (Johnson et al., 2022) and dam-reservoir systems (Johnson et al., 2021). More info: [https://daac.ornl.gov/cgi-bin/dsviewer.pl?ds\\_id=1918](https://daac.ornl.gov/cgi-bin/dsviewer.pl?ds_id=1918) and [https://daac.ornl.gov/CLIMATE/guides/Global\\_Lakes\\_Methane.html](https://daac.ornl.gov/CLIMATE/guides/Global_Lakes_Methane.html).

For peatlands and mineral soils in EU27, the VERIFY JSBACH-HIMMELI framework was used. For the seven global case-studies, estimates from the LPJ-GUESS model were used.

Geological emissions were initially based on the global gridded emissions from Etiope et al. 2019 and previously used in Petrescu et al., 2023. They are updated for this study (see below section 2.2).

### 2.1 LPJ-GUESS

In peatland soil, LPJ-GUESS uses the hydrology scheme of Wania et al. (2009) and Granberg et al. (1999), in which the water table depth is updated daily in response to precipitation, snowmelt, evapotranspiration and surface runoff. The 2m peatland soil column is subdivided into an upper 0.3 m acrotelm (within which the water table is allowed to fluctuate) above a 1.7 m permanently saturated catotelm layer. The water table is also allowed to extend above the soil surface to a maximum depth of 0.1 m. CH<sub>4</sub> production is simulated based on the degree of anoxia, vertical root distribution in two plant function types (i.e., flood tolerant C3 graminoids and sphagnum mosses), and the fraction of heterotrophic respiration (Wania et al., 2010). CH<sub>4</sub> is assumed to not be produced in dry and frozen soils. In non-peatland soils, CH<sub>4</sub> production is calculated as a fraction of heterotrophic respiration (Spahni et al., 2011). Methane transport includes three pathways: diffusion, plant-mediated and ebullition.

The model outputs need to be multiplied with the wetland fraction in each grid cell. The wetland fraction used used the remotely sensed monthly wetland inundation data from the WAD2M dataset (Zhang et al., 2021). This dataset comprises microwave satellite observations and static wetland maps that represent all inundated and

waterlogged inland wetlands during 2000–2020. For the period 1990-2000, the wetland fraction used the value from the year 2000, which means the wetland fraction in this period is static. LPJ GUESS is forced with a transient climate (surface air temperature, total precipitation, surface incoming shortwave radiation, wet-days) from the CRU\_ts\_4.05 data set before a spin-up simulation of 500 years using a de-trended climate from 1901-1930.

## 2.2 Global geological methane emissions (with updated EU49) and country-level breakdown, based on a global gridded seepage model

The global gridded geo-methane emission from the model of Etiope et al. (2019) has been re-calculated using the updated gridded emission from Europe (EU49) as reported in Petrescu et al. (2023). Country-level breakdown of the global gridded emission (onshore only) has also been performed, as requested.

Table 1 summarizes the global and European geo-emission estimates derived in previous works (Etiope et al. 2019; Petrescu et al. 2023), and the updated global estimate using the EU49 in Petrescu et al. (2023).

Table S2. Global and European geo-CH<sub>4</sub> emission estimates (Tg yr<sup>-1</sup>)

|                                                       | Etiope et al<br>(2019) | Petrescu et al<br>(2023) | Present<br>work |
|-------------------------------------------------------|------------------------|--------------------------|-----------------|
| Global                                                | 37.5                   |                          |                 |
| EU27                                                  |                        |                          | 2.12            |
| EU49 (onshore + offshore )                            |                        | 7.2                      |                 |
| EU49 derivable from the original<br>global grid model | 13.7                   |                          |                 |
| Updated global with new EU49                          |                        |                          | 31              |

It is important to remember that the global model of Etiope et al. (2019), exclusively targeted for gridding purposes, was based on “activity” and “emission factors” statistically derived by limited datasets, and it was mainly developed to provide the spatial distribution the geological methane sources, their CH<sub>4</sub> isotopic composition (<sup>13</sup>C) and potential emission intensity. Especially at continental scale, the emission values derived should, therefore, be considered only in terms of “order of magnitude”. The overall uncertainties of the spatial distribution of the geo-CH<sub>4</sub> sources and CH<sub>4</sub> emissions depend on individual uncertainties of the four categories of seepage, which are discussed in Etiope et al. (2019).

Concerning the gridded country-level breakdown, we caution that splitting the global gridded emission (at 1° resolution) into individual countries is not recommended in principle, because the model uses approximative input parameters that are only acceptable at the global scale, resulting in country scale values that may not be representative of the actual emission. In addition, the country values differ depending on whether grid cells or centroids are selected within the ArcGIS masks.

Using cells results in multiple counting of cells falling on country boundaries (so the total sum of country emissions is greater than the global), whereas using centroids results in underestimation in some countries (and in a total sum that is lower than the global). For example, for Italy, using centroids 39 cells are lost resulting in a missing emission of 106494 ton/y. An alternative, but more laborious, solution to this problem is to "break" the cells at the boundaries, so that only the emission related to the fraction of the cell that is inside a country boundary is considered.

We are evaluating this procedure in ArcGIS. However, as stated previously, this exercise does not resolve the issue of the applicability to the country level of a model that was built with parameters that have acceptable approximations only at the global scale. For this study, we used the averaged results from cells and centroids.

The annexed excel table reports five different country-levels breakdowns (geo-CH<sub>4</sub> emission in Tg yr<sup>-1</sup>), from:

1. the global grid model (Etiope et al, 2019) reported by Worden et al (2022).
2. the global grid model (Etiope et al, 2019) using cells
3. the global grid model (Etiope et al, 2019) using centroids
4. the global grid model (Etiope et al, 2019) with updated EU49 (Petrescu et al. 2023) using cells
5. the global grid model (Etiope et al, 2019) with updated EU49 (Petrescu et al. 2023) using centroids

Table S3 shows the top 10 countries with higher geological methane emissions, including DR Congo and Brazil. Table S4 shows the breakdown for EU27+UK.

As explained above, the cell-based and centroid-based breakdowns have different values. For the original global grid (without updated EU49), the total sum of the countries does not match the global onshore emission (33.6 Tg CH<sub>4</sub> yr<sup>-1</sup>; Etiope et al. 2019). This indicates that country-specific values must be evaluated with caution. Anyway, in all breakdowns performed, the top 10 countries are the same, with slight changes in the relative ranking of Indonesia (above China using the cells, below China using centroids).

Concerning the breakdown reported by Worden et al. (2022), we observe that all countries have an emission value (indicated as “priors” or “inventory”), with a minimum of 0.04 Tg yr<sup>-1</sup>. We ignore the reason for this. Although it is not explained in Worden et al (2022), based on the total sum we assume that cell-based breakdown was applied. We also observe significant differences with the cell-based breakdown performed by us (e.g. Russia).

A further example of the limits and inadequacy of country-level breakdown from global models, is given by oddities in the top-down emission estimated in Worden et al. (2022), based on satellite data and global chemistry transport model: in some countries the derived geologic emissions (posteriors) are negative (Azerbaijan, Italy,...), or 4-5 times higher than the data extracted from the global model of Etiope et al. (2019) without reasonable motivation (e.g., Japan). Worden et al (2022) admit that “*given the co-location of seep emissions with oil and coal, care must be taken in interpreting our results for seep emissions estimates*”.

*Table S3. Top 10 countries resulting with the highest geo-CH<sub>4</sub> emission (emission in Tg yr<sup>-1</sup>) in the several breakdowns (performed by Worden et al., 2022; performed by us using the original Etiope et al (2019) global grid using cells and centroids; performed using the global model with updated EU49 grid, Petrescu et al. 2023). Brazil and DR Congo are also reported as requested.*

| Breakdown by Worden et al (2022) |          | Breakdown using cells |          |         | Breakdown using centroids |          |             | Breakdown with updated EU49 using cells |          |         | Breakdown with updated EU49 using centroids |          |             |
|----------------------------------|----------|-----------------------|----------|---------|---------------------------|----------|-------------|-----------------------------------------|----------|---------|---------------------------------------------|----------|-------------|
| Country                          | Emission | Country               | Emission | N.Cells | Country                   | Emission | N.Centroids | Country                                 | Emission | N.Cells | Country                                     | Emission | N.Centroids |
| USA                              | 6.7      | USA                   | 7.46     | 1377    | USA                       | 6.53     | 1108        | USA                                     | 7.46     | 1377    | USA                                         | 6.53     | 1108        |
| Russian Fed.                     | 2.6      | Russian Federation    | 3.72     | 3485    | Russian Fed.              | 2.19     | 2939        | Russian Fed.                            | 2.86     | 3485    | Russian Fed.                                | 1.67     | 2939        |
| Azerbaijan                       | 2.8      | Azerbaijan            | 2.95     | 31      | Azerbaijan                | 2.74     | 18          | Azerbaijan                              | 2.36     | 31      | Azerbaijan                                  | 2.26     | 18          |
| Canada                           | 1.1      | Canada                | 1.38     | 2261    | Canada                    | 1.11     | 1709        | Canada                                  | 1.38     | 2261    | Canada                                      | 1.11     | 1709        |
| Indonesia                        | 0.62     | Indonesia             | 1.28     | 371     | Indonesia                 | 0.96     | 152         | Indonesia                               | 1.28     | 371     | Indonesia                                   | 0.96     | 152         |
| China                            | 1        | China                 | 1.26     | 1095    | China                     | 1.21     | 952         | China                                   | 1.26     | 1095    | China                                       | 1.21     | 952         |
| Italy                            | 2.9      | Italy                 | 2.99     | 74      | Italy                     | 2.69     | 35          | Italy                                   | 1.11     | 74      | Italy                                       | 1.01     | 35          |
| Romania                          | 2.1      | Romania               | 2.27     | 46      | Romania                   | 2        | 26          | Romania                                 | 0.94     | 46      | Romania                                     | 0.83     | 26          |
| Japan                            | 0.96     | Japan                 | 0.91     | 95      | Japan                     | 0.59     | 34          | Japan                                   | 0.91     | 95      | Japan                                       | 0.59     | 34          |
| Venezuela                        | 0.66     | Venezuela             | 0.76     | 108     | Venezuela                 | 0.55     | 75          | Venezuela                               | 0.76     | 108     | Venezuela                                   | 0.55     | 75          |
| Brazil                           | 0.06     | Brazil                | 0.08     | 813     | Brazil                    | 0.06     | 705         | Brazil                                  | 0.08     | 813     | Brazil                                      | 0.06     | 705         |
| DR Congo                         | 0.04     | DR Congo              | 0.07     | 236     | DR Congo                  | 0.02     | 188         | DR Congo                                | 0.07     | 236     | DR Congo                                    | 0.02     | 188         |

Table S4. Country-level breakdown for EU27+UK, after updates in Petrescu et al. (2023). Emission in Tg yr<sup>-1</sup>.

| Country        | Centroids | Emission    |
|----------------|-----------|-------------|
| Austria        | 12        | 0.05        |
| Belgium        | 3         | 0.00        |
| Bulgaria       | 12        | 0.01        |
| Croatia        | 7         | 0.01        |
| Cyprus         | 0         | 0.00        |
| Czech Repub    | 9         | 0.03        |
| Denmark        | 8         | 0.00        |
| Estonia        | 6         | 0.00        |
| Finland        | 65        | 0.00        |
| France         | 66        | 0.03        |
| Germany        | 44        | 0.03        |
| Greece         | 12        | 0.02        |
| Hungary        | 10        | 0.02        |
| Ireland        | 8         | 0.00        |
| <b>Italy</b>   | <b>36</b> | <b>1.01</b> |
| Latvia         | 12        | 0.00        |
| Lithuania      | 9         | 0.00        |
| Luxembourg     | 0         | 0.00        |
| Malta          | 0         | 0.00        |
| Netherlands    | 5         | 0.00        |
| Poland         | 41        | 0.05        |
| Portugal       | 13        | 0.00        |
| <b>Romania</b> | <b>25</b> | <b>0.83</b> |
| Slovakia       | 5         | 0.02        |
| Slovenia       | 2         | 0.00        |
| Spain          | 50        | 0.01        |
| Sweden         | 77        | 0.00        |
| UK             | 33        | 0.06        |

### 3. CH<sub>4</sub> emission data from inversions

Atmospheric inversions optimize prior estimates of emissions and sinks through modeling frameworks that utilizes atmospheric observations as a constraint on fluxes. Emission estimates from inversions depend on the data set of atmospheric measurements and the choice of the atmospheric model, as well as on other inputs (e.g., prior emissions and their uncertainties). Some of the inversions allow for explicit attribution to different sectors, while others optimize all fluxes in each grid cell and then attribute emissions to sectors using prior grid-cell fractions (see details in Saunois et al. 2020 for global inversions). For CH<sub>4</sub>, regional inversions were used for EU27 estimates while global inversion frameworks were used for the seven global case-studies (Table S2).

Descriptions of inverse models are found in Petrescu et al., 2023a, Appendix A1.2.

The new models are described below:

#### 3.1 CAMSv21r1

The CAMS global methane flux inversion system provides time series of gridded CH<sub>4</sub> emission estimates that are updated every year. The release v21r1 used in this study was produced in 2022 and covers the time period 1979-2021 (Segers et al., 2022). Emissions are estimated using the TM5-4DVAR inversion system that uses surface and eventually also satellite observations to constrain the emissions.

The inversion system is built around the TM5 global tracer transport model (Huijnen et al., 2010). In this application the model uses meteorological data from the ECMWF ERA5 re-analysis to simulate gridded mixing ratios of CH<sub>4</sub>. A horizontal model resolution of 3°x2° degrees is used, with 34 vertical layers that are defined as a coarsening of the original ERA5 layers. Physical processes include emission, advection, convection and vertical diffusion, and chemical reactions. The chemical destruction of CH<sub>4</sub> is described using offline computed mixing

ratios of OH and in the stratosphere also of O(<sup>1</sup>D) and Cl<sup>•</sup> obtained from various simulations with the CAMS global chemistry model.

The inversion system optimized four groups of emissions. The largest emissions are the anthropogenic emissions that are taken from EDGAR v6.0 (Crippa et al., 2021), which provides global gridded emissions at monthly temporal resolution. This emission group also contains some smaller sources from oceans, wild animals, and termites, and the soil sink. Emissions from rice paddies are considered a separate group and also these are taken from EDGAR v6.0. The third emission group is formed by wetland emissions which are taken from simulations with the LPJ-wsl model (Zhang et al., 2018). Emissions from biomass burning are taken from GFAS (Kaiser et al., 2012) as fourth group. Emissions are optimized at monthly resolution. An *a priori* uncertainty of 50% is assumed for the anthropogenic sources and 100% for the other. A horizontal correlation is assumed with a length scale of 500 km, and for the anthropogenic sources also a temporal correlation is assumed with a length scale of 9.5 months.

In a first inversion, only surface observations are used to constrain the emissions. The observations are taken from remote locations in the NOAA network (Lan et al., 2022), where the observation representation errors are parameterized following (Bergamaschi et al., 2010). In a second inversion, also column mixing ratios from the GOSAT satellite instrument are taken into account over the period 2009-2021 (Parker and Boesch, 2020). When comparing the GOSAT columns with the TM5 simulations, a bias correction is applied that was derived from the surface-only *posterior* simulations, to ensure that simulations at the surface are kept in agreement with the NOAA observations. Each of the emission time series are optimized in a single inversion, employing a temporal parallelization scheme (Pandey et al., 2022). The results are evaluated by comparison with surface observations that are not used in the inversion, FTIR profiles, satellite retrievals, and air craft observations.

### 3.2 TM5-4DVAR and TROPOMI data

Within the ESA Methane+ project<sup>1</sup>, CH<sub>4</sub> inversions were performed using TM5-4DVAR and TROPOMI data. TM5-4DVAR is a version of the TM5-model<sup>2</sup> (e.g. Huijnen et al., 2010) developed for 4DVAR data assimilation of satellite and surface observations of CH<sub>4</sub>. In the setup used here, the model runs from 1-1-2018 till 1-4-2021, but the output is validated from 1-5-2018 till 1-1-2021 to allow for spin-up and spin-down. The model runs on a horizontal grid of 6 × 4 degree (longitude × latitude) and ERA 5 meteo is used to drive the model. The 4 source categories that are being optimised (“biomass burning”, “rice”, “wetlands”, and “other”) are the same as in the CAMS reanalysis and have distinct spatio-temporal properties so that the inversion algorithm can distinguish their effect on the CH<sub>4</sub> concentration. The initial concentration field is derived from a CAMS inversion using surface measurements only (version v20r1) and is not updated in the inversion.

The SRON scientific TROPOMI product has been used in the inversion (Lorente et al., 2023), which uses a 3<sup>rd</sup> order polynomial fit to correct some artefacts that were caused by spectral features of the underlying surfaces. Only cloud-free retrievals have been used, and a bias correction has been applied based on an inversion using only surface data. The retrievals were then combined into super observations with the same resolution as the model grid, using a weighted average based on the uncertainty provided in the data product.

### 3.3 CTE-GCP2021 USA trends

---

1 <https://methanepius.eu/>  
2 <https://tm5.site.pro/>

The CTE-GCP2021 inverse model was run with both EDGAR and GAINS prior information. We will investigate here Western and Eastern regions in the USA (Figure S1).

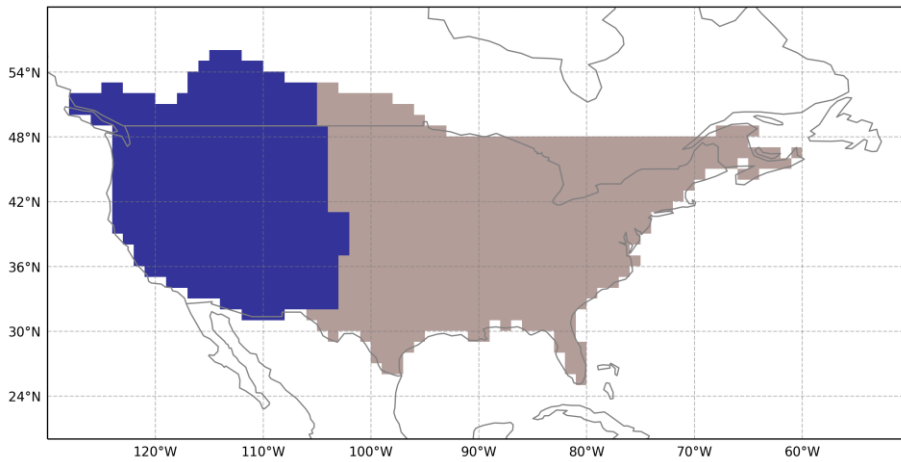

Figure S1: Western (blue) and eastern (brown) regions of USA where regional emission estimates are investigated.

In Western USA, oil & gas emissions are increased from the GAINS prior (dotted red), and the increasing trend in GAINS CH<sub>4</sub> emissions are as well pronounced in the posterior estimates (full red) with magnitudes between 8 – 18 Tg CH<sub>4</sub> yr<sup>-1</sup> from 2000-2020 (Figure S2). Both prior and posterior from EDGAR (black) keep a flat trend. In both cases, the posteriors follow the prior trends.

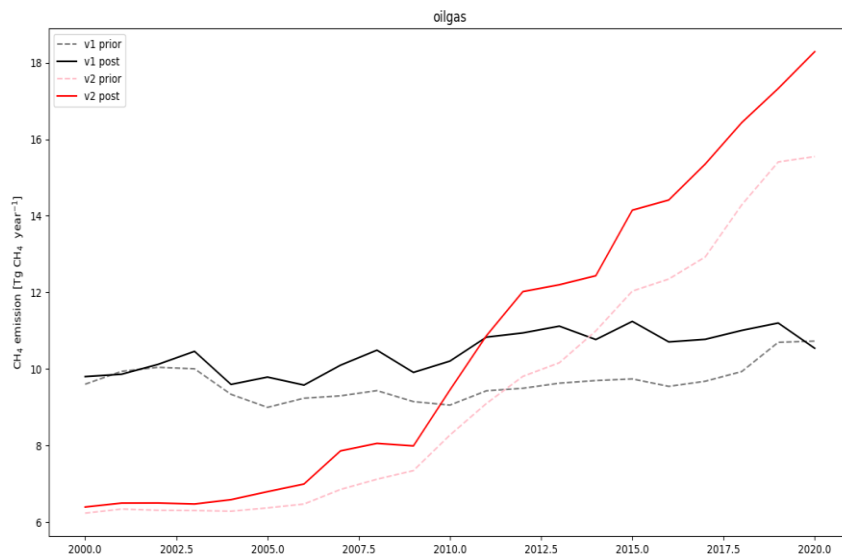

Figure S2: Western USA comparison between oil and gas emissions from CTE-GCP2021 runs using EDGAR (v1 black) and GAINS (v2 red) priors.

In Eastern USA, where the Permian basin is located, the oil & gas emission magnitude is very different for the GAINS priors (40 – 120 Tg CH<sub>4</sub> yr<sup>-1</sup>) (Figure S3), showing a similar increasing trend between 2000-2020 as the Eastern part. The run using EDGAR as prior registers a high jump in 2010. Also in this region, the posteriors are following the priors.

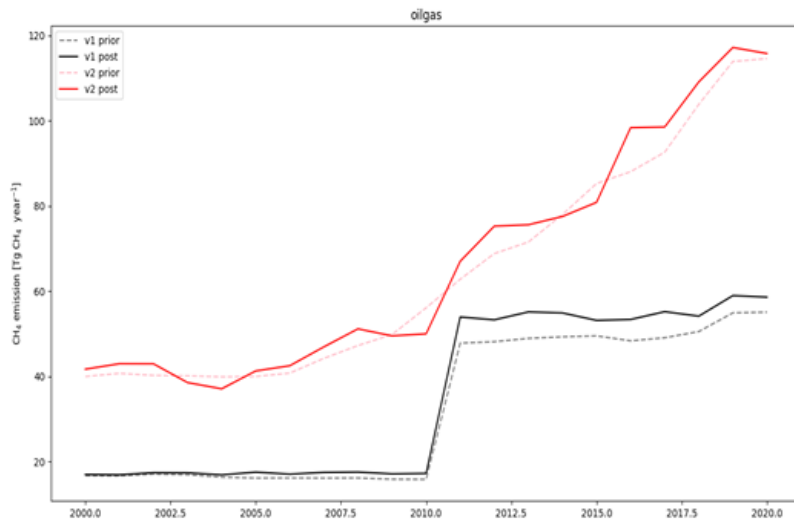

Figure S3: Eastern USA comparison between oil and gas emissions from CTE-GCP2021 runs using EDGAR (v1 black) and GAINS (v2 red) priors.

In both regions, posterior emissions are higher for coal and show decreasing trends, and this triggers a stronger increasing trend in total emissions for the runs using GAINS (Figures S4).

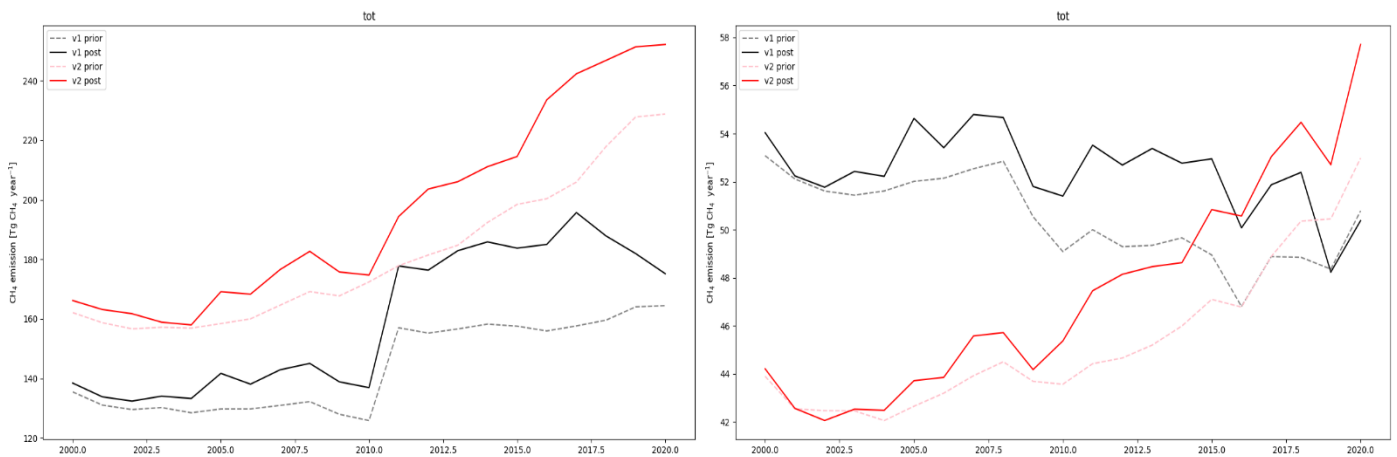

Figure S4: Eastern (left) and Western (right) USA comparison between CTE-GCP2021 total  $CH_4$  emissions using EDGAR (v1 black) and GAINS (v2 red) priors.

It is still under investigation if the atmospheric observations have a role and might induce such an abrupt increased trend in the runs using GAINS as prior.



## 4. Abbreviations

Table S5: Main abbreviations used in the main paper and in the Supplementary Information.

| Abbreviation / Acronym | Description/meaning                                                                                                                     |
|------------------------|-----------------------------------------------------------------------------------------------------------------------------------------|
| AD                     | Activity data                                                                                                                           |
| AFOLU                  | Agriculture, Forestry and Other Land Use sector                                                                                         |
| BB                     | Biomass burning                                                                                                                         |
| BU                     | Bottom-up                                                                                                                               |
| BURs                   | Biennial Update Reports                                                                                                                 |
| CAMS                   | Copernicus Atmosphere Monitoring Service                                                                                                |
| CEOS                   | Committee on Earth Observation Satellites                                                                                               |
| CH <sub>4</sub>        | Methane                                                                                                                                 |
| CHIMERE                | Open source multi-scale chemistry-transport model                                                                                       |
| CIF                    | Community Inversion Framework                                                                                                           |
| CoCO <sub>2</sub>      | Prototype system for a Copernicus CO <sub>2</sub> service                                                                               |
| CO <sub>2</sub> MVS    | CO <sub>2</sub> emissions monitoring and verification support                                                                           |
| COP                    | Conference of the Parties to the UNFCCC                                                                                                 |
| CRF                    | Common Reporting Format tables                                                                                                          |
| CTE-CH <sub>4</sub>    | CarbonTracker Europe CH <sub>4</sub> inversion model                                                                                    |
| ECMWF                  | European Centre for Medium-Range Weather Forecasts                                                                                      |
| EDGAR                  | Emission Database for Global Atmospheric Research                                                                                       |
| EEA                    | European Environment Agency                                                                                                             |
| EF                     | Emission factor                                                                                                                         |
| EIA                    | US Energy Information Administration                                                                                                    |
| EU                     | European Union                                                                                                                          |
| FAO                    | Food and Agriculture Organization of the United Nations                                                                                 |
| FAOSTAT                | Statistics division of the Food and Agriculture Organization of the United Nations                                                      |
| FLEXPART               | The FLEXible PARTicle dispersion model                                                                                                  |
| FLExKF                 | FLEXPART extended Kalman filter high-resolution inverse modelling system                                                                |
| GAINS                  | Greenhouse Gas and Air Pollution interactions and Synergies Model                                                                       |
| GEOS                   | NASA Goddard Earth Observation System                                                                                                   |
| GFED                   | Global Fire Emissions Dataset                                                                                                           |
| GHG                    | Greenhouse Gas                                                                                                                          |
| GOSAT                  | Greenhouse Gases Observing Satellite                                                                                                    |
| GMP                    | Global Methane Pledge                                                                                                                   |
| GWP                    | Global Warming Potential                                                                                                                |
| IEA-WEO                | International Energy Agency-World Energy Outlook                                                                                        |
| IPCC                   | Intergovernmental Panel on Climate Change                                                                                               |
| IPPU                   | Industrial Processes and Product Use                                                                                                    |
| LULUCF                 | Land Use, Land-Use Change and Forestry                                                                                                  |
| LPJ-GUESS              | Flexible framework for modelling the structure and dynamics of terrestrial ecosystems at landscape, regional and global scales          |
| MIROC                  | Model for Interdisciplinary Research on Climate                                                                                         |
| NDCs                   | Nationally Determined Contributions                                                                                                     |
| NGHGI                  | National Greenhouse Gas Inventories                                                                                                     |
| NOAA GML               | National Oceanic and Atmospheric Administration, Global Monitoring Laboratory <a href="https://www.noaa.gov/">https://www.noaa.gov/</a> |
| ORNL DAAC              | Oak Ridge National Laboratory, Distributed Data Archive Center                                                                          |
| PED                    | Prior Emissions Dataset                                                                                                                 |
| ppb                    | Parts per billion                                                                                                                       |
| PRIMAP                 | Potsdam Real-Time Integrated Model for the probabilistic Assessment of Emission Pathways                                                |
| QA/QC                  | Quality assurance/quality control                                                                                                       |
| RECCAP2                | Regional Carbon Cycle Assessment and Processes                                                                                          |

|         |                                                                                  |
|---------|----------------------------------------------------------------------------------|
| TD      | Top-down                                                                         |
| TROPOMI | Tropospheric Monitoring Instrument                                               |
| UNFCCC  | United Nations Framework Convention on Climate Change                            |
| US EPA  | United States Environmental Protection Agency                                    |
| USSR    | Union of Soviet Socialist Republics                                              |
| VERIFY  | Verifying greenhouse gas emissions, EU H2020 project, grant agreement no. 776810 |
| WP      | Work package                                                                     |

## 5. References:

Berchet, A., Sollum, E., Thompson, R. L., Pison, I., Thanwerdas, J., Broquet, G., Chevallier, F., Aalto, T., Berchet, A., Bergamaschi, P., Brunner, D., Engelen, R., Fortems-Cheiney, A., Gerbig, C., Groot Zwaafink, C. D., Haussaire, J.-M., Henne, S., Houweling, S., Karstens, U., Kutsch, W. L., Lujckx, I. T., Monteil, G., Palmer, P. I., van Peet, J. C. A., Peters, W., Peylin, P., Potier, E., Rödenbeck, C., Saunio, M., Scholze, M., Tsuruta, A., and Zhao, Y.: The Community Inversion Framework v1.0: a unified system for atmospheric inversion studies, *Geosci. Model Dev.*, 14, 5331–5354, <https://doi.org/10.5194/gmd-14-5331-2021>, 2021.

Bergamaschi, P., Krol, M., Meirink, J. F., Dentener, F., Segers, A., van Aardenne, J., Monni, S., Vermeulen, A. T., Schmidt, M., Ramonet, M., Yver, C., Meinhardt, F., Nisbet, E. G., Fisher, R. E., O'Doherty, S., & Dlugokencky, E. J.: Inverse modeling of European CH<sub>4</sub> emissions 2001-2006. *Journal of Geophysical Research*, 115(D22), D22309. <https://doi.org/10.1029/2010JD014180>, 2010.

Bruhwyler, L., Dlugokencky, E., Masarie, K., Ishizawa, M., Andrews, A., Miller, J., Sweeney, C., Tans, P. and Worthy, D.: CarbonTracker-CH<sub>4</sub>: an assimilation system for estimating emissions of atmospheric methane, *Atmos. Chem. Phys.*, 14(16), 8269–8293, doi:10.5194/acp-14-8269-2014, 2014.

Brunner, D., Arnold, T., Henne, S., Manning, A., Thompson, R. L., Maione, M., O'Doherty, S., and Reimann, S.: Comparison of four inverse modelling systems applied to the estimation of HFC-125, HFC-134a, and SF<sub>6</sub> emissions over Europe, *Atmos. Chem. Phys.*, 17, 10651–10674, <https://doi.org/10.5194/acp-17-10651-2017>, 2017.

Brunner, D., Henne, S., Keller, C. A., Reimann, S., Vollmer, M. K., O'Doherty, S., and Maione, M.: An extended Kalman-filter for regional scale inverse emission estimation, *Atmos. Chem. Phys.*, 12, 3455–3478, <https://doi.org/10.5194/acp-12-3455-2012>, 2012.

Chandra, Naveen., Patra, P., Bisht, J., Ito, A., Umezawa, T., Saigusa, N., Morimoto, S., Aoki, S., Janssens-Maenhout, G., Fujita, R., Takigawa, M., Watanabe, S., Saitoh, N. and Canadell, J.G., Emissions from the oil and gas sectors, coal mining and ruminant farming drive methane growth over the past three decades, *JOURNAL OF THE METEOROLOGICAL SOCIETY OF JAPAN*, ISSN 0026-1165, 99 (2), p. 309-337, JRC123075, 2021.

Choulga, M., Janssens-Maenhout, G., Super, I., Solazzo, E., Agusti-Panareda, A., Balsamo, G., Bousserez, N., Crippa, M., Denier van der Gon, H., Engelen, R., Guizzardi, D., Kuenen, J., McNorton, J., Oreggioni, G., and

Visschedijk, A.: Global anthropogenic CO<sub>2</sub> emissions and uncertainties as a prior for Earth system modelling and data assimilation, *Earth Syst. Sci. Data*, 13, 5311–5335, <https://doi.org/10.5194/essd-13-5311-2021>, 2021.

Crippa, M., Oreggioni, G., Guizzardi, D., Muntean, M., Schaaf, E., Lo Vullo, E., Solazzo, E., Monforti-Ferrario, F., Olivier, J. G. J., and Vignati, E.: Fossil CO<sub>2</sub> and GHG emissions of all world countries – 2019 Report, EUR 29849 EN, Publications Office of the European Union, Luxembourg, ISBN 978-92-76-11100-9, <https://doi.org/10.2760/687800>, JRC117610, 2019.

Crippa, M., Solazzo, E., Huang, G., Guizzardi, D., Koffi, E. N., Muntean, M., Schieberle, C., Friedrich, R., and Janssens-Maenhout, G.: Towards time varying emissions: development of high resolution temporal profiles in the Emissions Database for Global Atmospheric Research, *Sci. Data.*, 7, 121, <https://doi.org/10.1038/s41597-020-0462-2>, 2020.

Crippa, Monica, Guizzardi, D., Muntean, M., Schaaf, E., Lo Vullo, E., Solazzo, E., Monforti-Ferrario, F., Olivier, J., & Vignati, E.: *EDGAR v6.0 Greenhouse Gas Emissions*. <http://data.europa.eu/89h/97a67d67-c62e-4826-b873-9d972c4f670b>, 2021.

D8.2 CoCO<sub>2</sub> project: Second synthesis of CO<sub>2</sub> and CH<sub>4</sub> observation-based emission estimates, <https://coco2-project.eu/node/360>, 2022.

Etiopie, G., Ciotoli, G., Schwietzke, S., and Schoell, M.: Gridded maps of geological methane emissions and their isotopic signature, *Earth Syst. Sci. Data*, 11, 1–22, <https://doi.org/10.5194/essd-11-1-2019>, 2019.

FAO: FAOSTAT, Statistics Division of the Food and Agricultural Organisation of the UN, statistics till 2021: <https://www.fao.org/faostat/en/#data/GT> (last access November 2023), 2023.

FAO: The State of Food and Agriculture: Social protection and agriculture: breaking the cycle of rural poverty, 2015, Rome, Italy, <http://www.fao.org/3/a-i4910e.pdf> (last access: September 2023), 2015.

Fortems-Cheiney, A., Pison, I., Broquet, G., Dufour, G., Berchet, A., Potier, E., Coman, A., Siour, G., and Costantino, L.: Variational regional inverse modeling of reactive species emissions with PYVAR-CHIMERE-v2019, *Geosci. Model Dev.*, 14, 2939–2957, <https://doi.org/10.5194/gmd-14-2939-2021>, 2021.

Gelaro, R., McCarty, W., Suárez, M. J., Todling, R., Molod, A., Takacs, L., Randles, C. A., Darmenov, A., Bosilovich, M. G., Reichle, R., Wargan, K., Coy, L., Cullather, R., Draper, C., Akella, S., Buchard, V., Conaty, A., da Silva, A. M., Gu, W., Kim, G.-K., Koster, R., Lucchesi, R., Merkova, D., Nielsen, J. E., Partyka, G., Pawson, S., Putman, W., Rienecker, M., Schubert, S. D., Sienkiewicz, M., and Zhao, B.: The Modern-Era Retrospective Analysis for Research and Applications, Version 2 (MERRA-2), *J. Climate*, 30, 5419–5454, <https://doi.org/10.1175/jcli-d-16-0758.1>, 2017.

Giglio, L., Randerson, J. T., and van der Werf, G. R.: Analysis of daily, monthly, and annual burned area using the fourth-generation global fire emissions database (GFED4), *J. Geophys. Res.-Biogeo.*, 118, 317–328, <https://doi.org/10.1002/jgrg.20042>, 2013.

Gütschow, J. and Pflüger, M.: The PRIMAP-hist national historical emissions time series (1750-2021) v2.4. Zenodo: <https://doi.org/10.5281/zenodo.7179775> 2022.

Höglund-Isaksson L., Gómez-Sanabria, A., Klimont, Z., Rafaj, P., and Schöpp, W.: Technical potentials and costs for reducing global anthropogenic methane emissions in the 2050 timeframe – results from the GAINS model, *Environ. Res. Commun.*, 2, 025004, <https://doi.org/10.1088/2515-7620/ab7457>, 2020.

Höglund-Isaksson, L.: Bottom-up simulations of methane and ethane from global oil and gas systems, *Environ. Res. Lett.*, 12, 024007, <https://doi.org/10.1088/1748-9326/aa583e>, 2017.

Houweling, S., Krol, M., Bergamaschi, P., Frankenberg, C., Dlugokencky, E. J., Morino, I., Notholt, J., Sherlock, V., Wunch, D., Beck, V., Gerbig, C., Chen, H., Kort, E. A., Röckmann, T., and Aben, I.: A multi-year methane inversion using SCIAMACHY, accounting for systematic errors using TCCON measurements, *Atmos. Chem. Phys.*, 14, 3991–4012, <https://doi.org/10.5194/acp-14-3991-2014>, 2014.

Huijnen, V., Williams, J., van Weele, M., van Noije, T., Krol, M., Dentener, F., Segers, A., Houweling, S., Peters, W., de Laat, J., Boersma, F., Bergamaschi, P., van Velthoven, P., Le Sager, P., Eskes, H., Alkemade, F., Scheele, R., Nédélec, P., & Pätz, H.-W.: The global chemistry transport model TM5: description and evaluation of the tropospheric chemistry version 3.0. *Geoscientific Model Development*, 3(2), 445–473. <https://doi.org/10.5194/gmd-3-445-2010>, 2010.

Ito, A. and Inatomi, M.: Use of a process-based model for assessing the methane budgets of global terrestrial ecosystems and evaluation of uncertainty, *Biogeosciences*, 9, 759–773, <https://doi.org/10.5194/bg-9-759-2012>, 2012.

Janssens-Maenhout, G., Crippa, M., Guizzardi, D., Muntean, M., Schaaf, E., Dentener, F., Bergamaschi, P., Pagliari, V., Olivier, J. G. J., Peters, J. A. H. W., van Aardenne, J. A., Monni, S., Doering, U., Petrescu, A. M. R., Solazzo, E., and Oreggioni, G. D.: EDGAR v4.3.2 Global Atlas of the three major greenhouse gas emissions for the period 1970–2012, *Earth Syst. Sci. Data*, 11, 959–1002, <https://doi.org/10.5194/essd-11-959-2019>, 2019.

Janssens-Maenhout, G., Pagliari, V., Guizzardi, D., and Muntean, M.: Global emission inventories in the Emission Database for Global Atmospheric Research (EDGAR) – Manual (I) I. Gridding: EDGAR emissions distribution on global gridmaps, EUR – Scientific and Technical Research Reports, Publications Office of the European Union, [http://publications.jrc.ec.europa.eu/repository/bitstream/JRC78261/edgarv4\\_manual\\_i\\_gridding\\_pubsys\\_final.pdf](http://publications.jrc.ec.europa.eu/repository/bitstream/JRC78261/edgarv4_manual_i_gridding_pubsys_final.pdf) (last access: 7 February 2018), 2013.

Johnson, M.S., Matthews, E., Bastviken, D., Du, J., and Genovese, V.: Global-Gridded Daily Methane Emissions Climatology from Lake Systems, 2003-2015. ORNL DAAC, Oak Ridge, Tennessee, USA. <https://doi.org/10.3334/ORNLDAAC/2008>, 2022.

Johnson, M.S.: Global-Gridded Daily Methane Emissions from Inland Dam-Reservoir Systems. ORNL DAAC, Oak Ridge, Tennessee, USA. <https://doi.org/10.3334/ORNLDAAC/1918>, 2021.

Kaiser, J. W., Heil, A., Andreae, M. O., Benedetti, A., Chubarova, N., Jones, L., Morcrette, J.-J., Razinger, M., Schultz, M. G., Suttie, M., & van der Werf, G. R.: Biomass burning emissions estimated with a global fire assimilation system based on observed fire radiative power. *Biogeosciences*, 9(1), 527–554. <https://doi.org/10.5194/bg-9-527-2012>, 2012.

Keita, S., Lioussé, C., Assamoi, E.-M., Doumbia, T., N'Datchoh, E. T., Gnamien, S., Elguindi, N., Granier, C., and Yoboué, V.: African anthropogenic emissions inventory for gases and particles from 1990 to 2015, *Earth Syst. Sci. Data*, 13, 3691–3705, <https://doi.org/10.5194/essd-13-3691-2021>, 2021.

Krol, M., Houweling, S., Bregman, B., van den Broek, M., Segers, A., van Velthoven, P., Peters, W., Dentener, F., and Bergamaschi, P.: The two-way nested global chemistry-transport zoom model TM5: algorithm and applications, *Atmos. Chem. Phys.*, 5, 417–432, <https://doi.org/10.5194/acp-5-417-2005>, 2005.

Lauerwald, R., Allen, G. H., Deemer, B. R., Liu, S., Maavara, T., Raymond, P., et al.: Inland water greenhouse gas budgets for RECCAP2: 2. Regionalization and homogenization of estimates. *Global Biogeochemical Cycles*, 37(5), e2022GB007658. <https://doi.org/10.1029/2022gb007658>, 2023.

Lorente, A., Borsdorff, T., Martinez-Velarte, M. C., and Landgraf, J.: Accounting for surface reflectance spectral features in TROPOMI methane retrievals, *Atmos. Meas. Tech.*, 16, 1597–1608, <https://doi.org/10.5194/amt-16-1597-2023>, 2023.

Nesser, H., Jacob, D. J., Maasakkers, J. D., Lorente, A., Chen, Z., Lu, X., Shen, L., Qu, Z., Sulprizio, M. P., Winter, M., Ma, S., Bloom, A. A., Worden, J. R., Stavins, R. N., and Randles, C. A.: High-resolution U.S. methane emissions inferred from an inversion of 2019 TROPOMI satellite data: contributions from individual states, urban areas, and landfills, *EGUsphere* [preprint], <https://doi.org/10.5194/egusphere-2023-946>, 2023.

Pandey, S., Houweling, S., & Segers, A.: Order of magnitude wall time improvement of variational methane inversions by physical parallelization: a demonstration using TM5-4DVAR. *Geosci. Model Dev.*, 15(11), 4555–4567. <https://doi.org/10.5194/gmd-15-4555-2022>, 2022.

Pandey, S., Houweling, S., Krol, M., Aben, I., Chevallier, F., Dlugokencky, E. J., Gatti, L. V., Gloor, E., Miller, J. B., Detmers, R., Machida, T., and Röckmann, T.: Inverse modeling of GOSAT-retrieved ratios of total column

CH<sub>4</sub> and CO<sub>2</sub> for 2009 and 2010, *Atmos. Chem. Phys.*, 16, 5043–5062, <https://doi.org/10.5194/acp-16-5043-2016>, 2016.

Parker, R.; Boesch, H.: University of Leicester GOSAT Proxy XCH<sub>4</sub> v9.0. Centre for Environmental Data Analysis, 07 May 2020. <https://dx.doi.org/10.5285/18ef8247f52a4cb6a14013f8235cc1eb>, 2020.

Patra, P.K., Krol, M.C., Prinn, R.G., Takigawa, M., Muhle, J., Montzka, S., Lal, S., Yamashita, Y., Naus, S., Chandra, N., Weiss, R.F., Krummerl, P.B., Fraser, P.J., O’Doherty, S., Elkins, J.W.: Methyl Chloroform Continues to Constrain the Hydroxyl (OH) Variability in the Troposphere. *Journal of Geophysical Research: Atmospheres*, 126(4), e2020JD033862, doi: [10.1029/2020jd033862](https://doi.org/10.1029/2020jd033862), 2021.

Peters, W., Miller, J. B., Whitaker, J., Denning, A. S., Hirsch, A., Krol, M. C., Zupanski, D., Bruhwiler, L., and Tans, P. P.: An ensemble data assimilation system to estimate CO<sub>2</sub> surface fluxes from atmospheric trace gas observations, *J. Geophys. Res.*, 110, D24304, <https://doi.org/10.1029/2005JD006157>, 2005.

Petrescu, A. M. R., Qiu, C., McGrath, M. J., Peylin, P., Peters, G. P., Ciais, P., Thompson, R. L., Tsuruta, A., Brunner, D., Kuhnert, M., Matthews, B., Palmer, P. I., Tarasova, O., Regnier, P., Lauerwald, R., Bastviken, D., Höglund-Isaksson, L., Winiwarter, W., Etiope, G., Aalto, T., Balsamo, G., Bastrikov, V., Berchet, A., Brockmann, P., Ciotoli, G., Conchedda, G., Crippa, M., Dentener, F., Groot Zwaaftink, C. D., Guizzardi, D., Günther, D., Haussaire, J.-M., Houweling, S., Janssens-Maenhout, G., Kouyate, M., Leip, A., Leppänen, A., Lugato, E., Maisonnier, M., Manning, A. J., Markkanen, T., McNorton, J., Muntean, M., Oreggioni, G. D., Patra, P. K., Perugini, L., Pison, I., Raivonen, M. T., Saunio, M., Segers, A. J., Smith, P., Solazzo, E., Tian, H., Tubiello, F. N., Vesala, T., van der Werf, G. R., Wilson, C., and Zaehle, S.: The consolidated European synthesis of CH<sub>4</sub> and N<sub>2</sub>O emissions for the European Union and United Kingdom: 1990–2019, *Earth Syst. Sci. Data*, 15, 1197–1268, <https://doi.org/10.5194/essd-15-1197-2023>, 2023.

Petrescu, A.M.R., Peters, G.P., Engelen, R., Houweling, S., Brunner, D., Tsuruta, A., Matthews, B., Patra, P.K., Belikov, D., Thompson, R.L., Höglund-Isaksson, L., Zhang, W., Segers, A.J., Etiope, G., Ciotoli, G., Peylin, P., Chevallier, F., Aalto, T., Andrew, R.M., Bastviken, D., Berchet, A., Broquet, G., Conchedda, G., Dellaert, S. N. C., Denier van der Gon, H., Gütschow, J., Haussaire, J.-M., Lauerwald, R., Markkanen, T., van Peet, J.C.A., Pison, I., Regnier, P., Solum, E., Scholze, M., Tenkanen, M., Tubiello, F.N., van der Werf, G.R., Worden, J.R.: Reconciliation of observation- and inventory- based CH<sub>4</sub> emissions for eight large global emitters, version 3, Zenodo [data set], <https://doi.org/10.5281/zenodo.12818506>, 2024.

Raivonen, M., Smolander, S., Backman, L., Susiluoto, J., Aalto, T., Markkanen, T., Mäkelä, J., Rinne, J., Peltola, O., Aurela, M., Lohila, A., Tomasic, M., Li, X., Larmola, T., Juutinen, S., Tuittila, E.-S., Heimann, M., Sevanto, S., Kleinen, T., Brovkin, V., and Vesala, T.: HIMMELI v1.0: Helsinki Model of MEthane buiLd-up and emIssion for peatlands, *Geosci. Model Dev.*, 10, 4665–4691, <https://doi.org/10.5194/gmd-10-4665-2017>, 2017.

Saunio, M., Stavert, A. R., Poulter, B., Bousquet, P., Canadell, J. G., Jackson, R. B., Raymond, P. A., Dlugokencky, E. J., Houweling, S., Patra, P. K., Ciais, P., Arora, V. K., Bastviken, D., Bergamaschi, P., Blake, D. R., Brailsford,

G., Bruhwiler, L., Carlson, K. M., Carrol, M., Castaldi, S., Chandra, N., Crevoisier, C., Crill, P. M., Covey, K., Curry, C. L., Etiope, G., Frankenberg, C., Gedney, N., Hegglin, M. I., Höglund-Isaksson, L., Hugelius, G., Ishizawa, M., Ito, A., Janssens-Maenhout, G., Jensen, K. M., Joos, F., Kleinen, T., Krummel, P. B., Langenfelds, R. L., Laruelle, G. G., Liu, L., Machida, T., Maksyutov, S., McDonald, K. C., McNorton, J., Miller, P. A., Melton, J. R., Morino, I., Müller, J., Murguia-Flores, F., Naik, V., Niwa, Y., Noce, S., O'Doherty, S., Parker, R. J., Peng, C., Peng, S., Peters, G. P., Prigent, C., Prinn, R., Ramonet, M., Regnier, P., Riley, W. J., Rosentretter, J. A., Segers, A., Simpson, I. J., Shi, H., Smith, S. J., Steele, L. P., Thornton, B. F., Tian, H., Tohjima, Y., Tubiello, F. N., Tsuruta, A., Viovy, N., Voulgarakis, A., Weber, T. S., van Weele, M., van der Werf, G. R., Weiss, R. F., Worthy, D., Wunch, D., Yin, Y., Yoshida, Y., Zhang, W., Zhang, Z., Zhao, Y., Zheng, B., Zhu, Q., Zhu, Q., and Zhuang, Q.: The Global Methane Budget 2000–2017, *Earth Syst. Sci. Data*, 12, 1561–1623, <https://doi.org/10.5194/essd-12-1561-2020>, 2020.

Segers, A.J.: Description of the CH<sub>4</sub> Inversion Production Chain, [https://atmosphere.copernicus.eu/sites/default/files/2021-01/CAMS73\\_2018SC3\\_D73.5.2.2-2020\\_202012\\_production\\_chain\\_Ver1.pdf](https://atmosphere.copernicus.eu/sites/default/files/2021-01/CAMS73_2018SC3_D73.5.2.2-2020_202012_production_chain_Ver1.pdf), 2020.

Segers, A.J.: Validation of the CH<sub>4</sub> surface flux inversion – reanalysis 1990–2019, Document Title (copernicus.eu), [https://atmosphere.copernicus.eu/sites/default/files/2021-02/CAMS73\\_2018SC2\\_D73.2.4.1-2020\\_202012\\_validation\\_CH4\\_1990-2019\\_v2.pdf](https://atmosphere.copernicus.eu/sites/default/files/2021-02/CAMS73_2018SC2_D73.2.4.1-2020_202012_validation_CH4_1990-2019_v2.pdf) (last access: June 2023), 2020.

Segers, A.J., Steinke, T., Houweling, S.: Evaluation and Quality Control document for observation-based CH<sub>4</sub> flux estimates for the period 1979-2021. CAMS report D55.2.4.1-2022, 2022.

Solazzo, E., Crippa, M., Guizzardi, D., Muntean, M., Choulga, M., and Janssens-Maenhout, G.: Uncertainties in the Emissions Database for Global Atmospheric Research (EDGAR) emission inventory of greenhouse gases, *Atmos. Chem. Phys.*, 21, 5655–5683, <https://doi.org/10.5194/acp-21-5655-2021>, 2021.

Spahni, R., Wania, R., Neef, L., van Weele, M., Pison, I., Bousquet, P., Frankenberg, C., Foster, P. N., Joos, F., Prentice, I. C., and van Velthoven, P.: Constraining global methane emissions and uptake by ecosystems, *Biogeosciences*, 8, 1643–1665, <https://doi.org/10.5194/bg-8-1643-2011>, 2011.

Soulie, A., Granier, C., Darras, S., Zilbermann, N., Doumbia, T., Guevara, M., Jalkanen, J.-P., Keita, S., Liousse, C., Crippa, M., Guizzardi, D., Hoesly, R., and Smith, S. J.: Global anthropogenic emissions (CAMSGLOB-ANT) for the Copernicus Atmosphere Monitoring Service simulations of air quality forecasts and reanalyses, *Earth Syst. Sci. Data*, 16, 2261–2279, <https://doi.org/10.5194/essd-16-2261-2024>, 2024.

Stocker, B. D., Spahni, R., and Joos, F.: DYPTOP: a cost-efficient TOPMODEL implementation to simulate sub-grid spatio-temporal dynamics of global wetlands and peatlands, *Geosci. Model Dev.*, 7, 3089–3110, <https://doi.org/10.5194/gmd-7-3089-2014>, 2014.

Super, I., Dellaert, S. N. C., Visschedijk, A. J. H., and Denier van der Gon, H. A. C.: Uncertainty analysis of a European high-resolution emission inventory of CO<sub>2</sub> and CO to support inverse modelling and network design, *Atmos. Chem. Phys.*, 20, 1795–1816, <https://doi.org/10.5194/acp-20-1795-2020>, 2020.

Susiluoto, J., Raivonen, M., Backman, L., Laine, M., Makela, J., Peltola, O., Vesala, T., and Aalto, T.: Calibrating the sqHIMMELI v1.0 wetland methane emission model with hierarchical modeling and adaptive MCMC, *Geosci. Model Dev.*, 11, 1199–1228, <https://doi.org/10.5194/gmd-11-1199-2018>, 2018.

TNO\_PED D2.1 Prior Emission Dataset (PED) 2016: <https://coco2-project.eu/index.php/node/327>, 2022, last access June 2024.

TNO PED D2.2 Prior Emissions data 2021: <https://coco2-project.eu/node/365>, 2023, last access June 2024.

Tubiello, F. N., Karl, K., Flammini, A., Gütschow, J., Obli-Laryea, G., Conchedda, G., Pan, X., Qi, S. Y., Halldórudóttir Heiðarsdóttir, H., Wanner, N., Quadrelli, R., Rocha Souza, L., Benoit, P., Hayek, M., Sandalow, D., Mencos Contreras, E., Rosenzweig, C., Rosero Moncayo, J., Conforti, P., and Torero, M.: Pre- and post-production processes increasingly dominate greenhouse gas emissions from agri-food systems, *Earth Syst. Sci. Data*, 14, 1795–1809, <https://doi.org/10.5194/essd-14-1795-2022>, 2022.

Tubiello, F. N., Salvatore, M., Rossi, S., Ferrara, A., Fitton, N., and Smith, P.: The FAOSTAT database of greenhouse gas emissions from agriculture, *Environ. Res. Lett.*, 8, 015009, <https://doi.org/10.1088/1748-326/8/1/015009>, 2013.

Tubiello, F. N.: Greenhouse Gas Emissions Due to Agriculture, *Enc. Food Security Sustain.*, 1, 196–205, <https://doi.org/10.1016/B978-0-08-100596-5.21996-3>, 2019.

UNFCCC, CRFs and NIRs: <https://unfccc.int/ghg-inventories-annex-i-parties/2023>, 2023.

van der Werf, G. R., Randerson, J. T., Giglio, L., van Leeuwen, T. T., Chen, Y., Rogers, B. M., Mu, M., van Marle, M. J. E., Morton, D. C., Collatz, G. J., Yokelson, R. J., and Kasibhatla, P. S.: Global fire emissions estimates during 1997–2016, *Earth Syst. Sci. Data*, 9, 697–720, <https://doi.org/10.5194/essd-9-697-2017>, 2017.

Wania, R., Ross, I., and Prentice, I. C.: Implementation and evaluation of a new methane model within a dynamic global vegetation model: LPJ-WHyMe v1.3.1, *Geosci. Model Dev.*, 3, 565–584, <https://doi.org/10.5194/gmd-3-565-2010>, 2010.

Wania, R., Ross, I., and Prentice, I. C.: Integrating peatlands and permafrost into a dynamic global vegetation model: 1. Evaluation and sensitivity of physical land surface processes, *Global Biogeochem. Cycles*, 23, GB3014, doi:10.1029/2008GB003412, 2009.



Worden, J. R., Cusworth, D. H., Qu, Z., Yin, Y., Zhang, Y., Bloom, A. A., ... & Jacob, D. J.: The 2019 methane budget and uncertainties at 1° resolution and each country through Bayesian integration Of GOSAT total column methane data and a priori inventory estimates. *Atmospheric Chemistry and Physics*, 22(10), 6811-6841, <https://doi.org/10.5194/acp-22-6811-2022>, 2022.

Zhang, Z., Fluet-Chouinard, E., Jensen, K., McDonald, K., Hugelius, G., Gumbrecht, T., Carroll, M., Prigent, C., Bartsch, A., and Poulter, B.: Development of the global dataset of Wetland Area and Dynamics for Methane Modeling (WAD2M) , *Earth Syst. Sci. Data*, 13, 2001–2023, <https://doi.org/10.5194/essd-13-2001-2021>, 2021.

Zhang, Z., Zimmermann, N. E., Calle, L., Hurtt, G., Chatterjee, A., & Poulter, B.: Enhanced response of global wetland methane emissions to the 2015-2016 El Niño-Southern Oscillation event. *Environmental Research Letters*, 13(7). <https://doi.org/10.1088/1748-9326/aac939>, 2018.
